# Supplementary material for: The Role of Cytokines in Epithelial–Mesenchymal Transition in Gynaecological Cancers: A Systematic Review
Source: MDPI journal article supplement (doi:10.3390/cells12030416), 2023-01-26
Supplement: s1 [file s1]

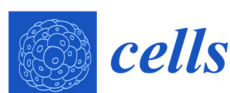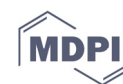

**File S1: Detailed search criteria for the systematic review according to PRISMA guidelines.**

*Systematic review*

# The role of cytokines in epithelial-mesenchymal transition in gynaecological cancers: a systematic review

Irene Ray <sup>1,2</sup>, Agnieszka Michael <sup>1,2</sup>, Lisiane B. Meira <sup>1</sup>, Patricia E. Ellis <sup>2</sup>

**File S1: Detailed search criteria for the systematic review according to PRISMA guide-lines.**

**Embase <1974 to 2022 October 11>**

1 \*cytokine/ 66820

2 cytokine.mp. [mp=title, abstract, heading word, drug trade name, original title, device manufacturer, drug manufacturer, device trade name, keyword heading word, floating subheading word, candidate term word] 621984

3 interleukin.mp. 832230

4 \*tumor necrosis factor/ 24268

5 \*transforming growth factor beta/ 22794

6 adiponectin.mp. [mp=title, abstract, heading word, drug trade name, original title, device manufacturer, drug manufacturer, device trade name, keyword heading word, floating subheading word, candidate term word] 44296

7 1 or 2 or 3 or 4 or 5 1131323

8 epithelial mesenchymal transition/ 57623

9 epithelial mesenchymal transition.mp. [mp=title, abstract, heading word, drug trade name, original title, device manufacturer, drug manufacturer, device trade name, keyword heading word, floating subheading word, candidate term word] 62460

10 \*epithelial mesenchymal transition/ 17957

11 "epithelial mesenchymal transformation".mp. 805

12 8 or 9 or 10 or 11 62753

13 \*endometrium cancer/ 18233

14 endometrial cancer\*.mp. [mp=title, abstract, heading word, drug trade name, original title, device manufacturer, drug manufacturer, device trade name, keyword heading word, floating subheading word, candidate term word] 34204

15 \*ovary cancer/ 51456

16 ovarian cancer.mp. [mp=title, abstract, heading word, drug trade name, original title, device manufacturer, drug manufacturer, device trade name, keyword heading word, floating subheading word, candidate term word] 96505

17 \*uterine cervix cancer/ 43321

18 cervical cancer.mp. [mp=title, abstract, heading word, drug trade name, original title, device manufacturer, drug manufacturer, device trade name, keyword heading word, floating subheading word, candidate term word] 78869

19 \*vulva tumor/ or \*vulva cancer/ or \*vulva carcinoma/ 6942

20 vulval cancer.mp. [mp=title, abstract, heading word, drug trade name, original title, device manufacturer, drug manufacturer, device trade name, keyword heading word, floating subheading word, candidate term word] 346

21 \*vagina cancer/ 1306

22 vaginal cancer.mp. [mp=title, abstract, heading word, drug trade name, original title, device manufacturer, drug manufacturer, device trade name, keyword heading word, floating subheading word, candidate term word] 1233

23 13 or 14 or 15 or 16 or 17 or 18 or 19 or 20 or 21 or 22 224266

24 7 and 12 and 23 276

25 limit 24 to yr="2000 -2022" 276

# **Ovid MEDLINE(R) ALL <1946 to October 11, 2022>**

1 \*Cytokines/ 59182

2 cytokine\*.mp. [mp=title, book title, abstract, original title, name of substance word, subject heading word, floating sub-heading word, keyword heading word, organism supplementary concept word, protocol supplementary concept word, rare disease supplementary concept word, unique identifier, synonyms] 479600

3 \*Interleukins/ 10138

4 interleukin\*.mp. [mp=title, book title, abstract, original title, name of substance word, subject heading word, floating sub-heading word, keyword heading word, organism supplementary concept word, protocol supplementary concept word, rare disease supplementary concept word, unique identifier, synonyms] 398900

5 ""Tumor Necrosis Factor Receptor-Associated Peptides and Proteins"/ 292

6 tumour necrosis factor.mp. [mp=title, book title, abstract, original title, name of substance word, subject heading word, floating sub-heading word, keyword heading word, organism supplementary concept word, protocol supplementary concept word, rare disease supplementary concept word, unique identifier, synonyms] 24167

7 \*Transforming Growth Factor beta/ 26027

8 TGF.mp. [mp=title, book title, abstract, original title, name of substance word, subject heading word, floating sub-heading word, keyword heading word, organism supplementary concept word, protocol supplementary concept word, rare disease supplementary concept word, unique identifier, synonyms] 85139

9 adiponectin.mp. [mp=title, book title, abstract, original title, name of substance word, subject heading word, floating sub-heading word, keyword heading word, organism supplementary concept word, protocol supplementary concept word, rare disease supplementary concept word, unique identifier, synonyms] 24101

10 1 or 2 or 3 or 4 or 5 or 6 or 7 or 8 773296

11 \*Epithelial-Mesenchymal Transition/ 10793

12 "epithelial-mesenchymal transformation".mp. [mp=title, book title, abstract, original title, name of substance word, subject heading word, floating sub-heading word, keyword heading word, organism supplementary concept word, protocol supplementary concept word, rare disease supplementary concept word, unique identifier, synonyms] 620

13 "epithelial-mesenchymal transition".mp. [mp=title, book title, abstract, original title, name of substance word, subject heading word, floating sub-heading word, keyword heading word, organism supplementary concept word, protocol supplementary concept word, rare disease supplementary concept word, unique identifier, synonyms] 34491

14 11 or 12 or 13 34889

15 gynaecological cancer.mp. 1377

16 \*Endometrial Neoplasms/ 20004

17 "endometrial cancer\*".mp. [mp=title, book title, abstract, original title, name of substance word, subject heading word, floating sub-heading word, keyword heading word, organism supplementary concept word, protocol supplementary concept word, rare disease supplementary concept word, unique identifier, synonyms] 21593

18 \*Ovarian Neoplasms/ 74967

19 "ovarian cancer\*".mp. [mp=title, book title, abstract, original title, name of substance word, subject heading word, floating sub-heading word, keyword heading word, organism supplementary concept word, protocol supplementary concept word, rare disease supplementary concept word, unique identifier, synonyms] 66311

20 \*Uterine Cervical Neoplasms/ 70367

21 "cervical cancer\*".mp. [mp=title, book title, abstract, original title, name of substance word, subject heading word, floating sub-heading word, keyword heading word, organism supplementary concept word, protocol supplementary concept word, rare disease supplementary concept word, unique identifier, synonyms] 57642

22 \*Vulvar Neoplasms/ 7340

23 "vulval cancers".mp. 33

24 \*Vaginal Neoplasms/ 4096

25 "vulval cancer\*".mp. [mp=title, book title, abstract, original title, name of substance word, subject heading word, floating sub-heading word, keyword heading word, organism supplementary concept word, protocol supplementary concept word, rare disease supplementary concept word, unique identifier, synonyms] 181

26 15 or 16 or 17 or 18 or 19 or 20 or 21 or 22 or 23 or 24 or 25 223845

27 10 and 14 and 26 206

28 limit 27 to yr="2000 - 2022" 205

## CINAHL

| Search ID# | Search Terms                           | Search Options                                                                                                       | Actions |
|------------|----------------------------------------|----------------------------------------------------------------------------------------------------------------------|---------|
| S1         | (MM "Cytokines")                       | Expanders - Apply equivalent View<br>subjects sults (8,654)<br>Search modes - Bool- View Details<br>ean/Phrase Edit  | Re-     |
| S2         | TX cytokine                            | Expanders - Apply equivalent View<br>subjects sults (48,899)<br>Search modes - Bool- View Details<br>ean/Phrase Edit | Re-     |
| S3         | (MM "Interleukins")                    | Expanders - Apply equivalent View<br>subjects sults (8,353)<br>Search modes - Bool- View Details<br>ean/Phrase Edit  | Re-     |
| S4         | TX interleukin                         | Expanders - Apply equivalent View<br>subjects sults (35,575)<br>Search modes - Bool- View Details<br>ean/Phrase Edit | Re-     |
| S5         | TX "tumour necrosis factor"            | Expanders - Apply equivalent View<br>subjects sults (2,688)<br>Search modes - Bool- View Details<br>ean/Phrase Edit  | Re-     |
| S6         | (MM "Tumor Necrosis Factor")           | Expanders - Apply equivalent View<br>subjects sults (6,839)<br>Search modes - Bool- View Details<br>ean/Phrase Edit  | Re-     |
| S7         | (MM "Transforming Growth Factor beta") | Expanders - Apply equivalent View Results (961)<br>subjects View Details<br>Search modes - Bool- Edit<br>ean/Phrase  |         |

|     |                                                           |                      |         |            |                    |     |
|-----|-----------------------------------------------------------|----------------------|---------|------------|--------------------|-----|
| S8  | TX "Transforming Growth Factor beta"                      | Expanders - subjects | Apply   | equivalent | View               | Re- |
|     |                                                           | Search               | modes - | Bool-      | sults (3,315)      |     |
|     |                                                           | ean/Phrase           |         | Edit       | View Details       |     |
| S9  | (MM "Adiponectin")                                        | Expanders - subjects | Apply   | equivalent | View               | Re- |
|     |                                                           | Search               | modes - | Bool-      | sults (1,700)      |     |
|     |                                                           | ean/Phrase           |         | Edit       | View Details       |     |
| S10 | TX adiponectin                                            | Expanders - subjects | Apply   | equivalent | View               | Re- |
|     |                                                           | Search               | modes - | Bool-      | sults (5,656)      |     |
|     |                                                           | ean/Phrase           |         | Edit       | View Details       |     |
| S11 | S1 OR S2 OR S3 OR S4 OR S5 OR S6 OR S7 OR S8 OR S9 OR S10 | Expanders - subjects | Apply   | equivalent | View               | Re- |
|     |                                                           | Search               | modes - | Bool-      | sults (81,559)     |     |
|     |                                                           | ean/Phrase           |         | Edit       | View Details       |     |
| S12 | (MM "Epithelial-Mesenchymal Transition")                  | Expanders - subjects | Apply   | equivalent | View Results (258) |     |
|     |                                                           | Search               | modes - | Bool-      | View Details       |     |
|     |                                                           | ean/Phrase           |         | Edit       | Edit               |     |
| S13 | TX "epithelial mesenchymal transition"                    | Expanders - subjects | Apply   | equivalent | View               | Re- |
|     |                                                           | Search               | modes - | Bool-      | sults (2,628)      |     |
|     |                                                           | ean/Phrase           |         | Edit       | View Details       |     |
| S14 | TX "epithelial mesenchymal transformation"                | Expanders - subjects | Apply   | equivalent | View Results (50)  |     |
|     |                                                           | Search               | modes - | Bool-      | View Details       |     |
|     |                                                           | ean/Phrase           |         | Edit       | Edit               |     |
| S15 | S12 OR S13 OR S14                                         | Expanders - subjects | Apply   | equivalent | View               | Re- |
|     |                                                           | Search               | modes - | Bool-      | sults (2,662)      |     |
|     |                                                           | ean/Phrase           |         | Edit       | View Details       |     |
| S16 | (MM "Endometrial Neoplasms")                              | Expanders - subjects | Apply   | equivalent | View               | Re- |
|     |                                                           | Search               | modes - | Bool-      | sults (4,365)      |     |
|     |                                                           | ean/Phrase           |         | Edit       | View Details       |     |
| S17 | TX "endometrial cancer"                                   | Expanders - subjects | Apply   | equivalent | View               | Re- |
|     |                                                           | Search               | modes - | Bool-      | sults (4,589)      |     |
|     |                                                           | ean/Phrase           |         | Edit       | View Details       |     |
| S18 | (MM "Ovarian Neoplasms")                                  | Expanders - subjects | Apply   | equivalent | View               | Re- |
|     |                                                           | Search               | modes - | Bool-      | sults (11,891)     |     |
|     |                                                           | ean/Phrase           |         | Edit       | View Details       |     |
| S19 | TX "ovarian cancer"                                       | Expanders - subjects | Apply   | equivalent | View               | Re- |
|     |                                                           | Search               | modes - | Bool-      | sults (12,245)     |     |
|     |                                                           | ean/Phrase           |         | Edit       | View Details       |     |
| S20 | (MM "Cervix Neoplasms")                                   | Expanders - subjects | Apply   | equivalent | View               | Re- |
|     |                                                           |                      |         |            | sults (14,247)     |     |

|     |                                                                       |                                                                |     |
|-----|-----------------------------------------------------------------------|----------------------------------------------------------------|-----|
|     |                                                                       | Search modes - Bool- View Details<br>ean/Phrase Edit           |     |
| S21 | TX "cervical cancer"                                                  | Expanders - Apply equivalent View Results (15,467)<br>subjects | Re- |
|     |                                                                       | Search modes - Bool- View Details<br>ean/Phrase Edit           |     |
| S22 | (MM "Vulvar Neoplasms")                                               | Expanders - Apply equivalent View Results (928)<br>subjects    |     |
|     |                                                                       | Search modes - Bool- View Details<br>ean/Phrase Edit           |     |
| S23 | TX "vulval cancer"                                                    | Expanders - Apply equivalent View Results (59)<br>subjects     |     |
|     |                                                                       | Search modes - Bool- View Details<br>ean/Phrase Edit           |     |
| S24 | (MM "Vaginal Neoplasms")                                              | Expanders - Apply equivalent View Results (408)<br>subjects    |     |
|     |                                                                       | Search modes - Bool- View Details<br>ean/Phrase Edit           |     |
| S25 | TX "vaginal cancer"                                                   | Expanders - Apply equivalent View Results (145)<br>subjects    |     |
|     |                                                                       | Search modes - Bool- View Details<br>ean/Phrase Edit           |     |
| S26 | S16 OR S17 OR S18 OR S19 OR S20 OR S21 OR S22 OR S23<br>OR S24 OR S25 | Expanders - Apply equivalent View Results (42,531)<br>subjects | Re- |
|     |                                                                       | Search modes - Bool- View Details<br>ean/Phrase Edit           |     |
| S27 | S11 AND S14 AND S26                                                   | Expanders - Apply equivalent View Results (0)<br>subjects      |     |
|     |                                                                       | Search modes - Bool- View Details<br>ean/Phrase Edit           |     |
| S28 | S11 AND S15 AND S26                                                   | Expanders - Apply equivalent View Results (9)<br>subjects      |     |
|     |                                                                       | Search modes - Bool- View Details<br>ean/Phrase Edit           |     |

## PubMed

((("cytokine\*" OR "interleukin\*" OR "tumour necrosis factor\*" OR "transforming growth factor\*" OR adiponectin) AND ("epithelial mesenchymal transformation" OR "epithelial mesenchymal transition")) AND ("gynecological cancer\*" OR "endometrial cancer\*" OR "ovarian cancer\*" OR "cervical cancer\*" OR "vulval cancer\*" OR "vaginal cancer\*")) 187

**Cochrane** (as above) 1

## TRIP

epithelial mesenchymal transition/transformation, cytokine, gynaecological cancer 7

## Web of Science

---

cytokines AND (epithelial mesenchymal transition OR transformation) AND (gynaecological cancer OR endometrial cancer OR ovarian cancer OR cervical cancer OR vulval cancer OR vaginal cancer) 11
